# Supplementary material
Source: publisher figshare collection journal article supplement (https://frontiersin.figshare.com/ndownloader/files/12352682)
Supplement: Supplementary file [file 12352682]

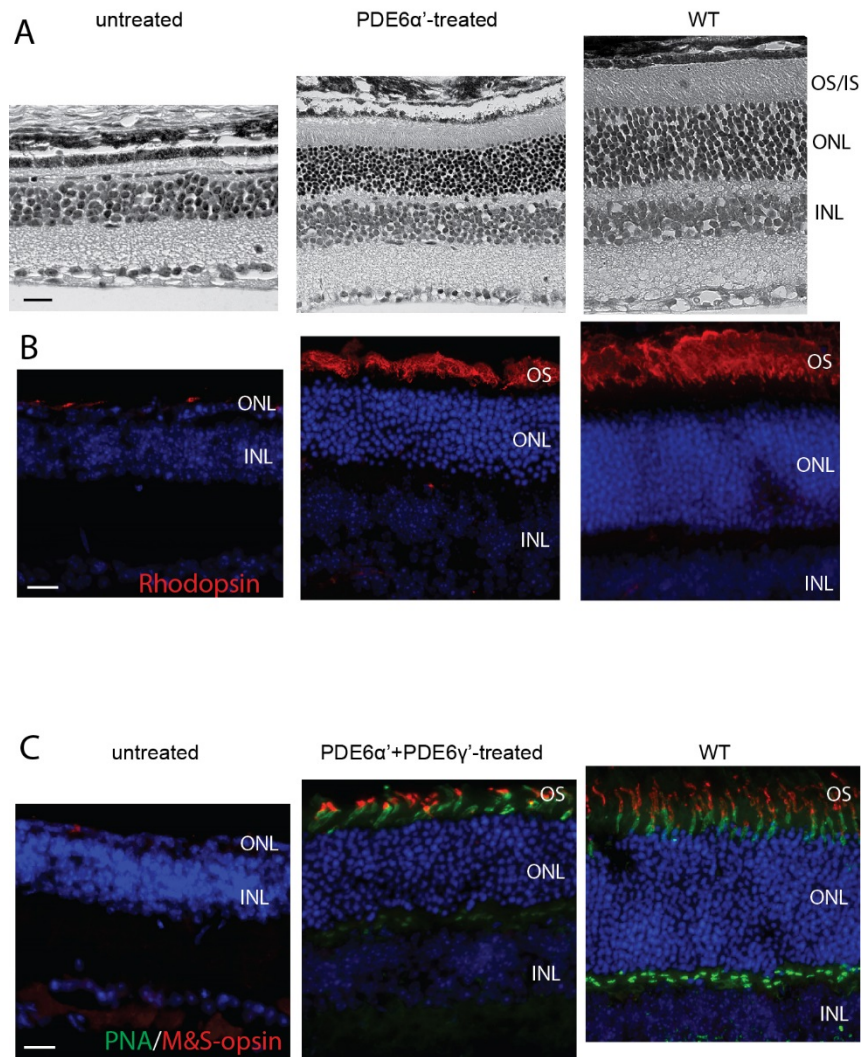

**Figure S1.** Retinal morphology is rescued following delivery of AAV-smCBA-PDE6 $\alpha'$ . (A) Retinal morphology shows rescue of rod photoreceptor cells indicated by much thicker outer nuclear layer (ONL) and outer/inner segments (OS/IS) in treated eyes. (B) Immunohistochemistry by anti-rhodopsin antibody confirms the more abundant rhodopsin expression in treated *rd10/cpfl1* eyes relative to untreated controls. (C) Immunohistochemistry by anti-M/S-cone opsin antibodies demonstrates cone rescue in treated *rd10/cpfl1* eyes. Scale bar: 20  $\mu$ m.

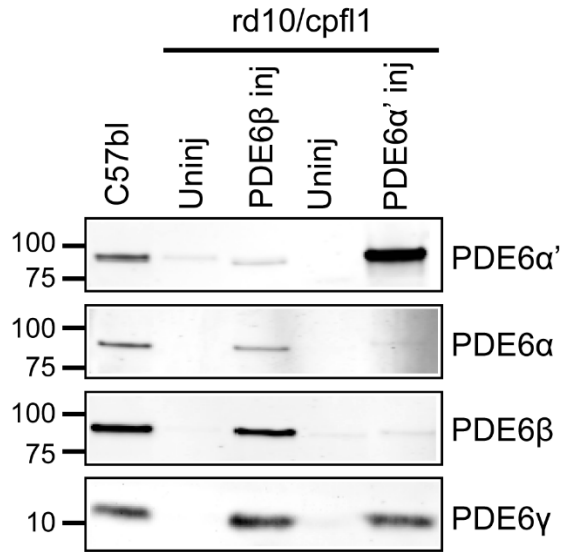

**Figure S2.** Injected rod PDE6 $\beta$  or cone PDE6 $\alpha'$  in *rd10/cpfl1* retinas are assembled with endogenous rod PDE6 $\gamma$  subunit. Immunoblot analysis of assembled PDE6 using ROS1-IP from retina of wild type controls, uninjected *rd10/cpfl1*, and *rd10/cpfl1* mice injected with rod PDE6 $\beta$  or cone PDE6 $\alpha'$ . The immunoblots were probed with indicated antibodies. A protein molecular weight scale is shown on the left.
